# Supplementary material
Source: publisher site journal article supplement (https://www.degruyterbrill.com/publication/isbn/9783110291650/downloadAsset/9783110291650_Inhaltsverzeichnis.pdf)
Supplement: Supplementary file 1 [file 9783110291650_Inhaltsverzeichnis.pdf]

# Inhalt

## Vorwort — V

### 1 Grundlagen — 1

- 1.1 Permutationsgruppen — 1
- 1.2 Kommutatoren — 17
- 1.3 Direkte und semidirekte Produkte — 26
- 1.4 Abelsche Gruppen — 32
- 1.5 Normalreihen — 36
- 1.6 Nilpotente Gruppen — 40
- 1.7 Die verallgemeinerte Fittinggruppe — 48
- 1.8 Die Frattinigruppe — 52
- 1.9 Übungen — 56

### 2 Automorphismen — 59

- 2.1 Die Sätze von Gaschütz, Schur und Zassenhaus — 59
- 2.2  $p'$ -Automorphismen von  $p$ -Gruppen — 71
- 2.3 Fixpunkte von Automorphismen — 82
- 2.4 Übungen — 91

### 3 Fusion und Transfer — 93

- 3.1 Transfer — 93
- 3.2 Fusion — 98
- 3.3 Ein Satz von Baer — 103
- 3.4 Die Sätze von Glauberman und Thompson — 105
- 3.5 Übungen — 123

### 4 Involutionen — 125

- 4.1 Der Satz von Brauer und Fowler — 125
- 4.2 Ordnungsformeln — 128
- 4.3 Übungen — 134

### 5 Einfache Gruppen — 135

- 5.1 Die lineare Gruppe — 135
- 5.2 Die Mathieu-Gruppen — 143
- 5.3 Die Gruppe  $HiS$  — 156
- 5.4 Die Chevalley- und Steinberg-Gruppen — 160
- 5.5 Übungen — 171

## Literaturverzeichnis — 175

## Index — 179
